# Supplementary material for: Supramolecular multiplexes from collagen mimetic peptide-PNA(GGG)3 conjugates and C-rich DNA: pH-induced reversible switching from triplex–duplex to triplex-i-motif
Source: Royal Society of Chemistry journal article supplement (doi:10.1039/d4bm00955j), 2024-10-25
Supplement: d4bm00955j1.pdf [file d4bm00955j1.pdf]

## Supplementary Information

### Supramolecular Multiplexes from Collagen Mimetic Peptide-PNA(GGG)<sub>3</sub> Conjugates and C-rich DNA: pH-induced reversible switching from triplex-duplex to triplex-i-motif

Shahaji H. More,<sup>a,b\*</sup> Marc Schmutz,<sup>b</sup> Loïc Jierry,<sup>b</sup> and Krishna N. Ganesh,<sup>a,c\*</sup>

<sup>a</sup> Department of Chemistry, Indian Institute of Science Education and Research (IISER) Tirupati, Karkambadi Road, Mangalam, Tirupati 517507, India.

<sup>b</sup> Université de Strasbourg, CNRS, Institut Charles Sadron (UPR22), 23 rue du Loess, 67034 Strasbourg Cedex 2, BP 84047, France.

<sup>c</sup> New Chemistry Unit, Jawaharlal Nehru Center for Advanced Scientific Research (JNCASR), Jakkur, Bengaluru 560094, India.

## Table of Contents

|            |                                                                                                                                               |   |
|------------|-----------------------------------------------------------------------------------------------------------------------------------------------|---|
| <b>S1.</b> | HPLC and MALDI-TOF spectra of Collagen-(PNA-GGG) <sub>3</sub> peptide CMP-3 & CMP-4                                                           | 2 |
| <b>S2.</b> | CD spectra and melting of collagen-(PNA-GGG) <sub>3</sub> peptide (CMP-3) at different salt concentrations                                    | 3 |
| <b>S3.</b> | CD spectra of Collagen-(PNA-GGG) <sub>3</sub> (CMP-3) with DNA 1 in 0.33 and 0.66 equivalents                                                 | 3 |
|            | <b>S3a: CD spectra of Collagen CMP-3 single strand (5 μM) + DNA 1</b>                                                                         | 4 |
| <b>S4.</b> | CD spectra of Collagen-(PNA-GGG) <sub>3</sub> (CMP-3) with mismatch DNA - T <sub>9</sub>                                                      | 4 |
| <b>S5.</b> | CD Melting of triplex in CMP-3:DNA 1 complex monitored at A <sub>225</sub> nm (pH 7.2)                                                        | 5 |
|            | <b>S5a: Raw CD Data for S5A</b>                                                                                                               | 5 |
| <b>S6.</b> | CD melting of <i>i</i> -motif of DNA 1 at A <sub>289</sub> nm at pH 4.5                                                                       | 6 |
|            | <b>S6a: Raw CD Data for S6</b>                                                                                                                | 6 |
| <b>S7.</b> | CD Melting of triplex in Collagen-(PNA-GGG) <sub>3</sub> :DNA 1 complex monitored at A <sub>225</sub> nm (pH 4.5) at different ratios         | 7 |
| <b>S8.</b> | CD Melting of <i>i</i> -motif in Collagen-(PNA-GGG) <sub>3</sub> :DNA 1 complex monitored at A <sub>289</sub> nm (pH 4.5) at different ratios | 7 |
|            | <b>S8a: Raw CD Graphs for Figures S7 and S8</b>                                                                                               | 8 |
| <b>S9</b>  | Collagen-(PNA-GGG) <sub>3</sub> CMP-3:DNA 1 gel electrophoresis at pH 4.5                                                                     | 8 |
| <b>S10</b> | TEM images of CMP-3 (triplex) +DNA1 at pH 7.2                                                                                                 | 9 |

|            |                                                                                                                             |    |
|------------|-----------------------------------------------------------------------------------------------------------------------------|----|
|            | <b>S10a Collagen CMP-3 (Single strand) +DNA 1 complex</b>                                                                   | 9  |
|            | <b>S10b PNA-GGG (15 <math>\mu</math>M) +DNA 1 complex</b>                                                                   | 10 |
|            | <b>S10c PNA-GGG (30 <math>\mu</math>M) +DNA 1 complex</b>                                                                   | 10 |
| <b>S11</b> | HPLC and MALDI-TOF spectra of PNA-(G) <sub>3</sub>                                                                          | 10 |
| <b>S12</b> | ThT Emission Spectra for PNA-(G) <sub>3</sub> , and PNA-(G) <sub>3</sub> +DNA1                                              | 11 |
| <b>S13</b> | Reversible switching of ThT Emission Spectra for the Collagen-(PNA-GGG) <sub>3</sub> Peptide-3:DNA1 between pH 7.2 & pH 4.5 | 11 |

### S1. HPLC and MALDI-TOF spectra of Collagen-(PNA-GGG)<sub>3</sub> peptide CMP-3 & CMP-4

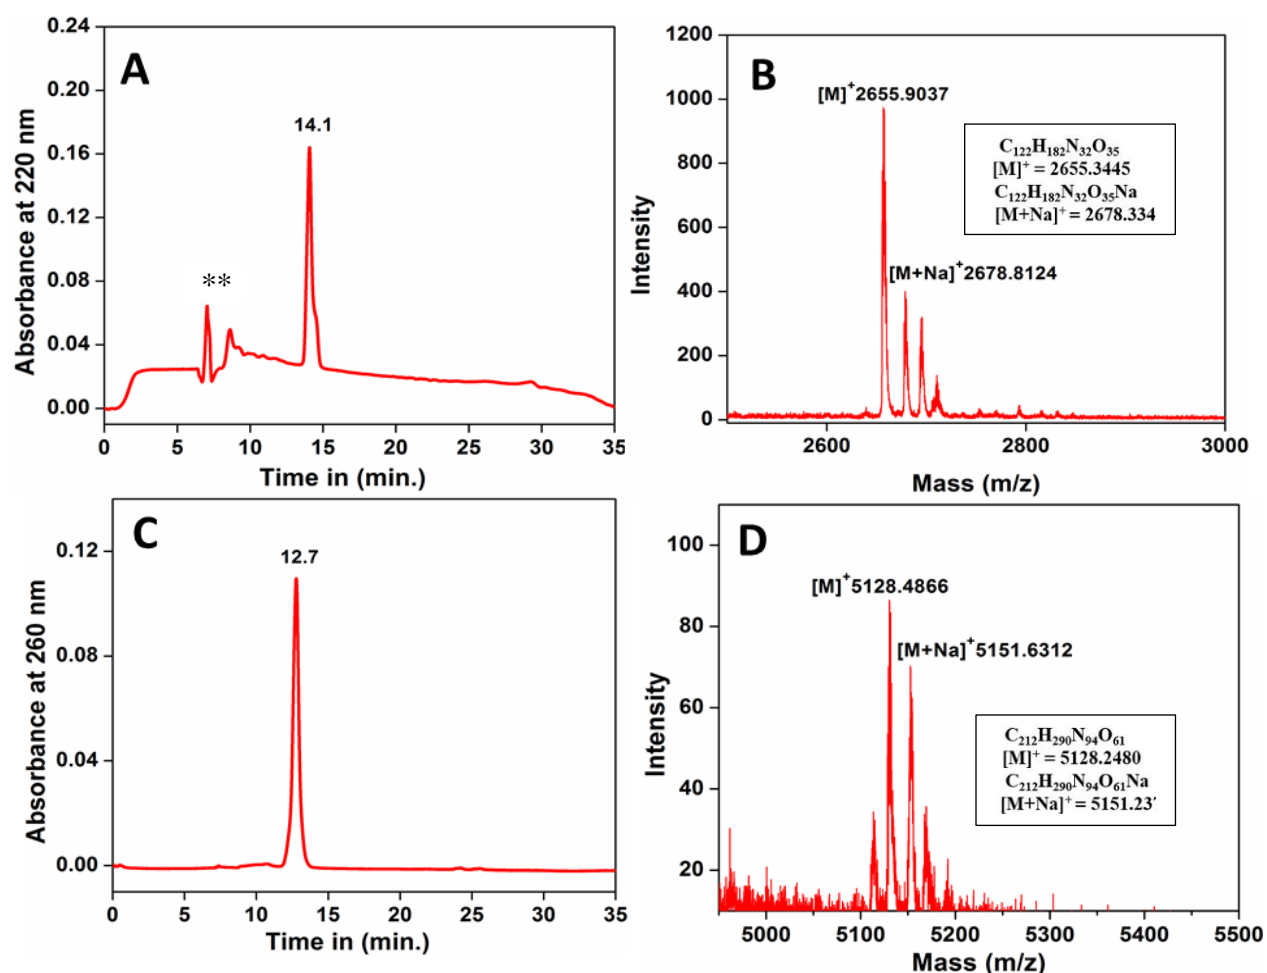

HPLC profiles (A, C) and MALDI-TOF spectra (B, D) for Collagen-(PNA-GGG)<sub>3</sub> peptide (CMP-3) and CMP-4 respectively. Inset in (B) and (D) are molecular formulae and calculated mass;  
 \* Impurity from solvent.

## S2. CD spectra and melting of collagen-(PNA-GGG)<sub>3</sub> peptide (CMP-3) at different salt concentrations

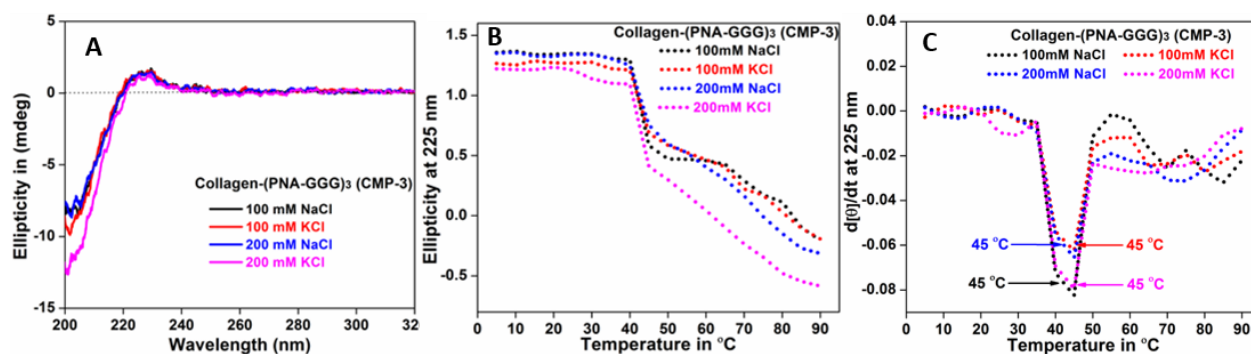

(A) CD spectra of collagen-(PNA-GGG)<sub>3</sub> (CMP-3) at 100 mM and 200 mM salt concentrations; (B) CD Melting (ellipticity vs temperature) monitored at  $\lambda_{225}$  nm in different salt concentrations (100, 200 mM; NaCl & KCl) (C) First derivative plots for data in (B). Temperature range is 5 °C to 90 °C; Buffer conditions: 10 mM Tris with 100 or 200 mM NaCl or KCl, pH 7.2.

## S3. CD spectra of Collagen-(PNA-GGG)<sub>3</sub> (CMP-3) with DNA 1 in 0.33 and 0.66 equivalents

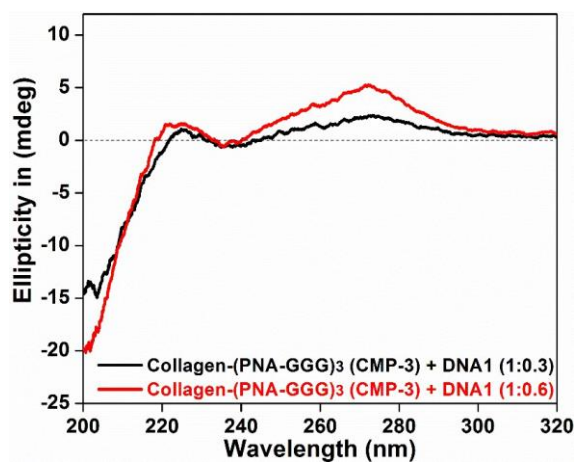

CD spectra of collagen-(PNA-GGG)<sub>3</sub> (CMP-3) with DNA 1 in 0.33 (black) and 0.66 (red) equivalents. Buffer 10 mM Tris, 10 mM NaCl, pH 7.2.

### S3a: CD spectra of Collagen CMP-3 single strand (5 $\mu\text{M}$ ) + DNA 1

Collagen-(PNA-GGG)<sub>3</sub> 5  $\mu\text{M}$  + DNA 1

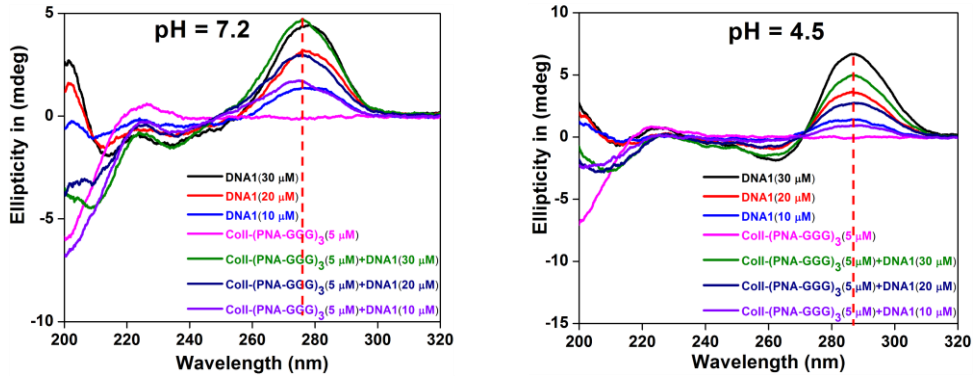

### S4. CD spectra of Collagen-(PNA-GGG)<sub>3</sub> (CMP-3) with mismatch DNA - T<sub>9</sub>

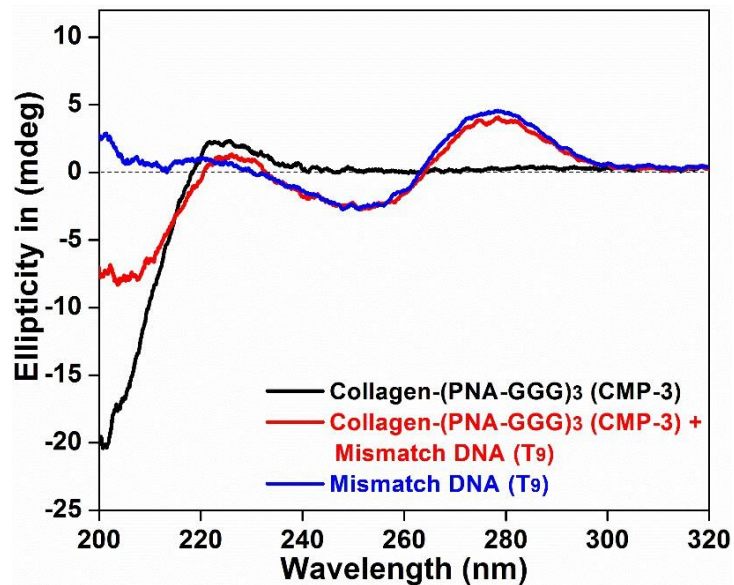

CD spectra of collagen-(PNA-GGG)<sub>3</sub> (CMP-3) with complete mismatch-DNA-T<sub>9</sub>. Buffer conditions: 10 mM Tris, 10 mM NaCl, pH 7.2.

**S5. CD Melting of triplex in CMP-3:DNA 1 complex monitored at  $\lambda = 225$  nm (pH 7.2)**

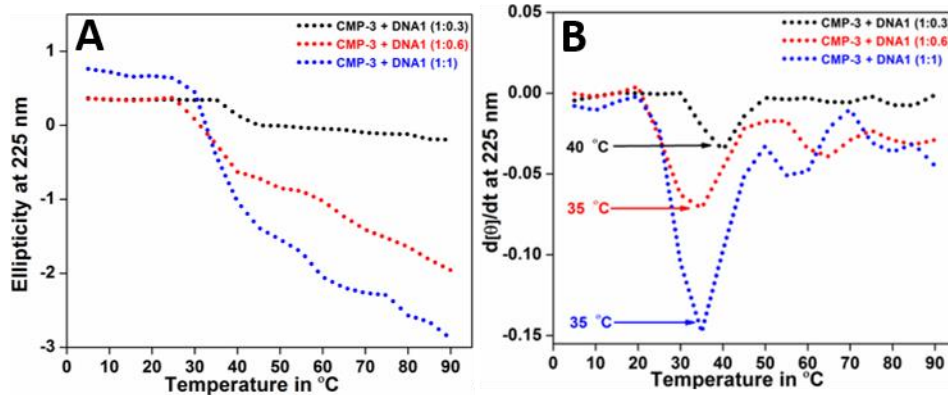

(A) Ellipticity at  $\lambda_{225}$  nm vs temperature plot for collagen-(PNA-GGG)<sub>3</sub> (CMP-3) with 0.33, 0.66 and 1.0 equivalents of DNA 1 (B) First derivative plots of data in (A). Buffer conditions: 10 mM Tris, 10 mM NaCl at pH 7.2.

**S5a: Raw CD Data for S5A**

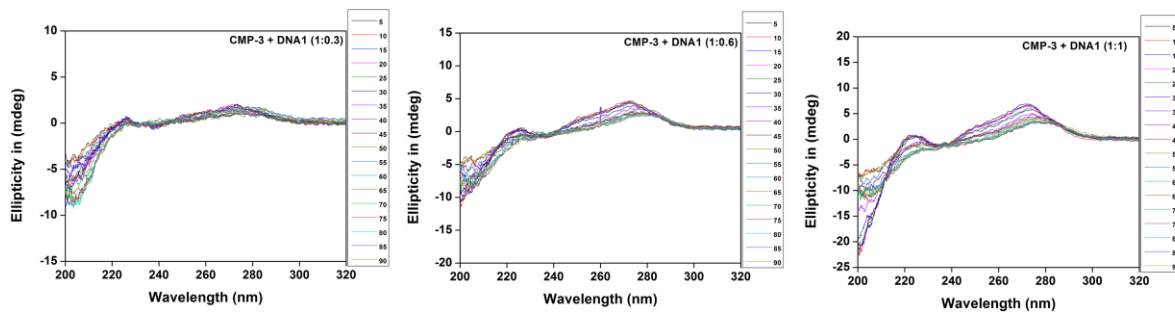

### S6. CD melting of *i*-motif of DNA1 at $\lambda_{289}$ nm at pH 4.5

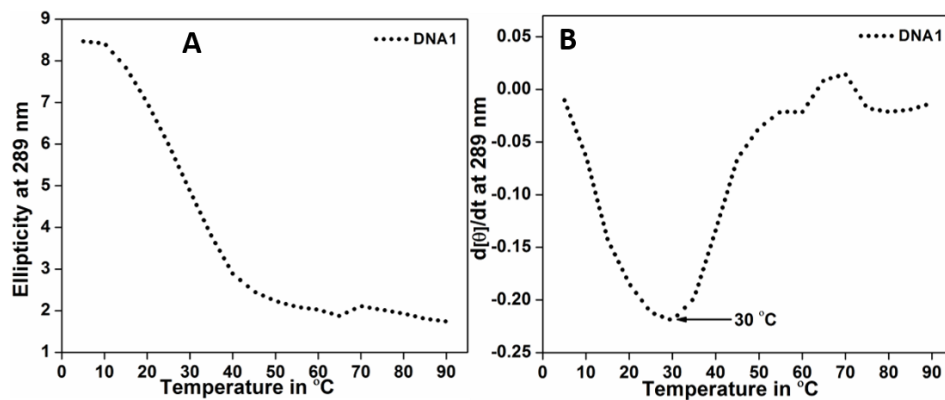

**Figure S6:** (A) Ellipticity vs temperature plot at  $\lambda_{289}$  nm for DNA 1 (30  $\mu$ M); (B) Derivative plots for data in (A). Buffer: 10 mM Tris, 10 mM NaCl at pH 4.5.

### S6a: Raw CD Data for S6A

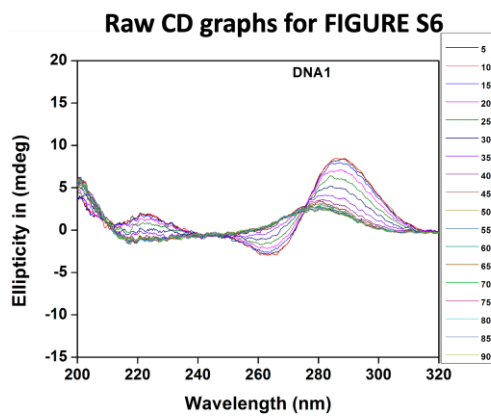

**S7. CD Melting of triplex in Collagen-(PNA-GGG)<sub>3</sub>:DNA 1 complex monitored at A<sub>225</sub> nm (pH 4.5) at different ratios**

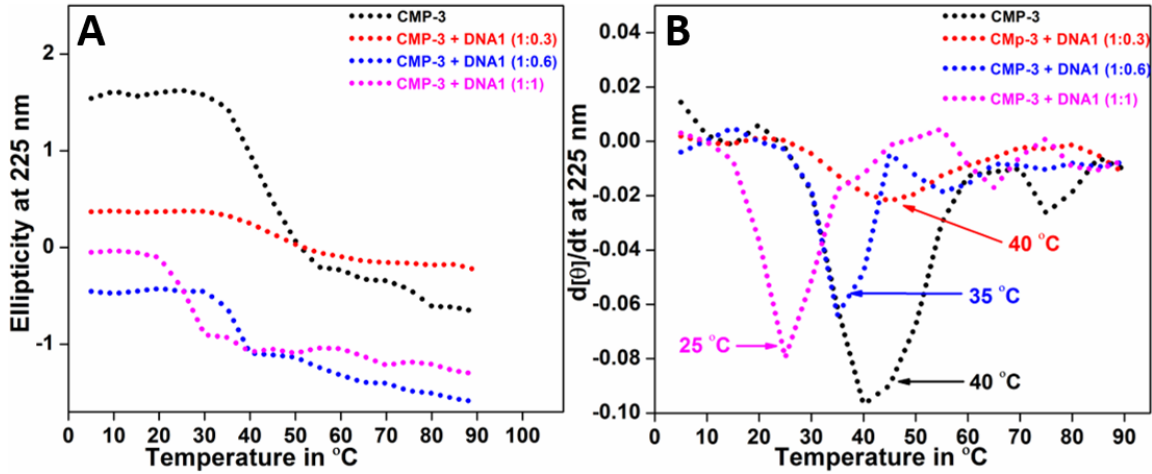

(A) Ellipticity vs temperature plot  $\theta_{225}$  nm for collagen-(PNA-GGG)<sub>3</sub> (CMP-3) with DNA 1 in 0.33, 0.66 and 1 equivalents (B) Derivative plots for collagen-(PNA-GGG)<sub>3</sub> (CMP-3)+DNA 1 complexes. Buffer conditions: 10 mM Tris, 10 mM NaCl at pH 4.5.

**S8. CD Melting of *i*-motif in Collagen-(PNA-GGG)<sub>3</sub>:DNA 1 complex monitored at A<sub>289</sub> nm (pH 4.5) at different ratios**

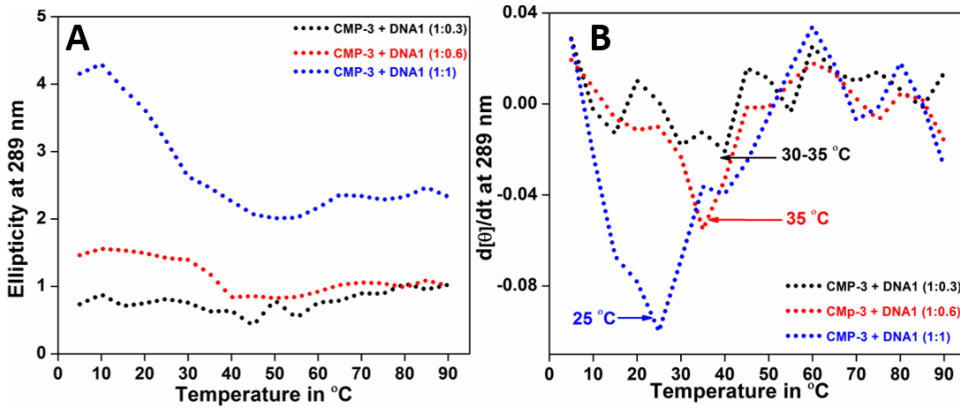

*i*-motif melting: (A) Ellipticity fall at 289 nm for collagen-(PNA-GGG)<sub>3</sub> (CMP-3) with DNA1 in 0.33, 0.66 and 1 equivalents (B) Derivative plots for collagen-(PNA-GGG)<sub>3</sub> (CMP-3) + DNA1 complexes. Buffer conditions: 10 mM Tris, 10 mM NaCl at pH 4.5.

**S8a: Raw CD Graphs for Figures S7 and S8**

CD graphs for FIGURE S7 & S8

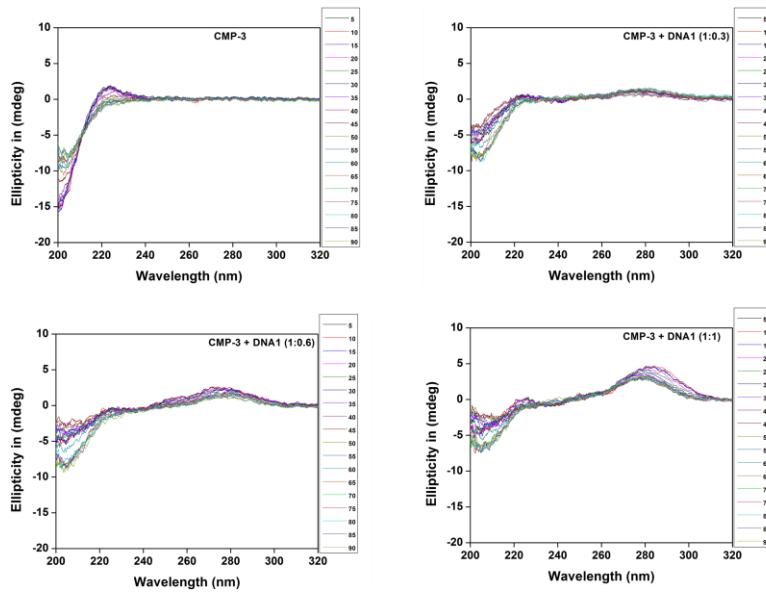

S9. Gel electrophoresis of Collagen-(PNA-GGG)<sub>3</sub> CMP 3:DNA 1 complex at pH 4.5

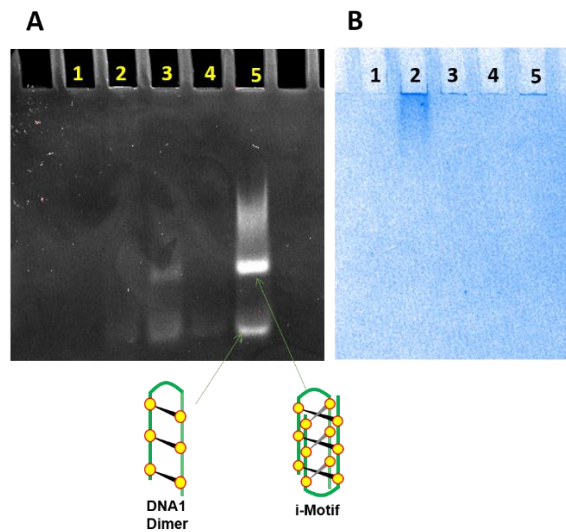

PAGE: (A) Staining with EB and (B) Staining with Coomassie brilliant blue. Lane 1; Collagen-(PNA-GGG)<sub>3</sub> (CMP-3), lanes 2-4; Collagen-(PNA-GGG)<sub>3</sub> (CMP-3):DNA 1 in 1:0.33, 1:0.6 and 1:1 ratios respectively, lane 5: Single stranded DNA 1 (10 μM). Peptide concentration in lanes 1-4 is 100 μM with equivalent DNA 1 concentration in respective ratios. Lane 5, ssDNA is 10 μM. Buffer: 40 mM Tris-acetate (pH = 4.5) with EDTA (1 mM).



**S10. TEM images of CMP-3 20  $\mu$ M (triplex) +DNA 1(20  $\mu$ M) at pH 7.2**

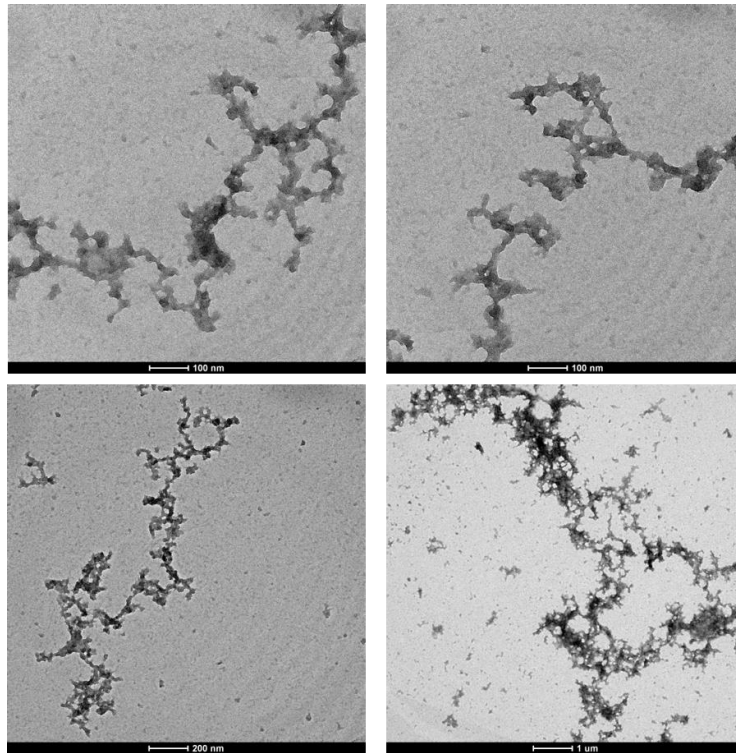

TEM images of CMP-3+DNA1 at pH 7.2.

**S10a Collagen CMP-3 (Single strand) +DNA 1 complex**

**pH = 7.2** Collagen-(PNA-GGG)<sub>3</sub> (2  $\mu$ M) Single strand  
+  
DNA1 (30  $\mu$ M)

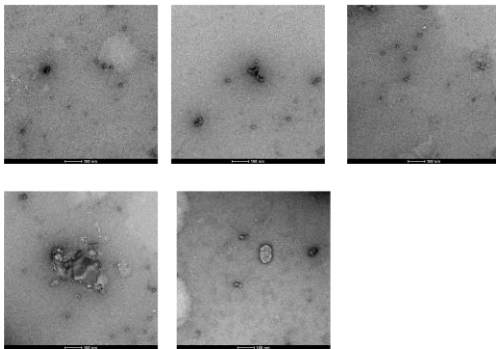

**pH = 4.5** Collagen-(PNA-GGG)<sub>3</sub> (2  $\mu$ M) Single strand  
+  
DNA1 (30  $\mu$ M)

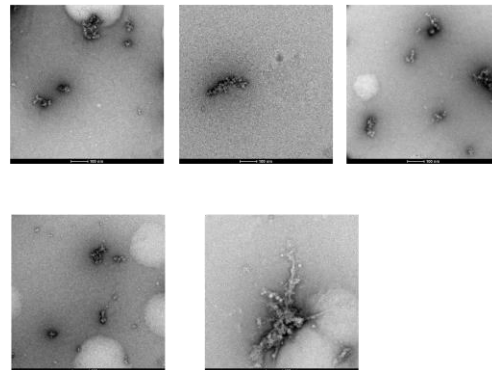

### S10b PNA-GGG (15 $\mu$ M) +DNA 1 complex

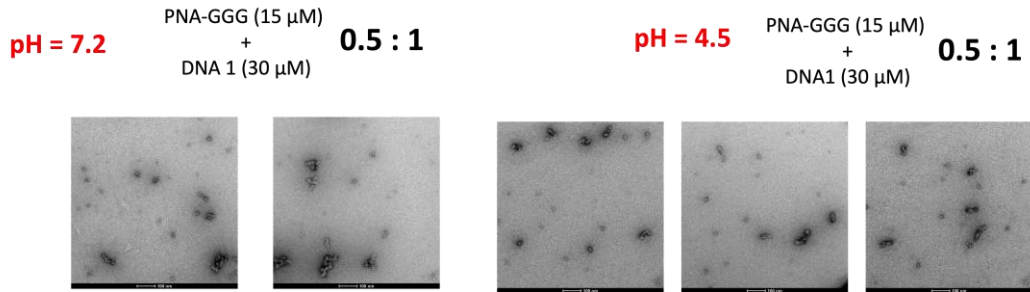

### S10c PNA-GGG (30 $\mu$ M) +DNA 1 complex

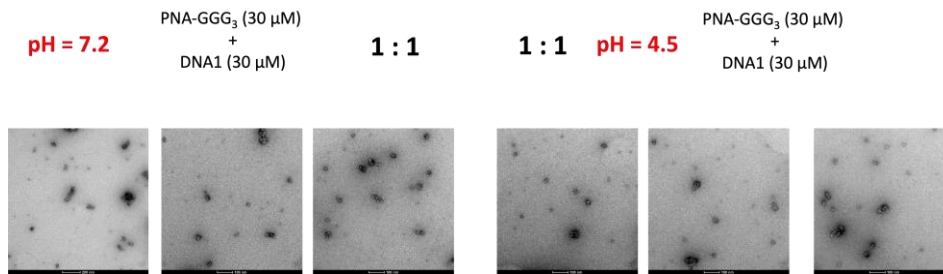

### S11. HPLC and MALDI-TOF spectra of PNA-(G)<sub>3</sub>

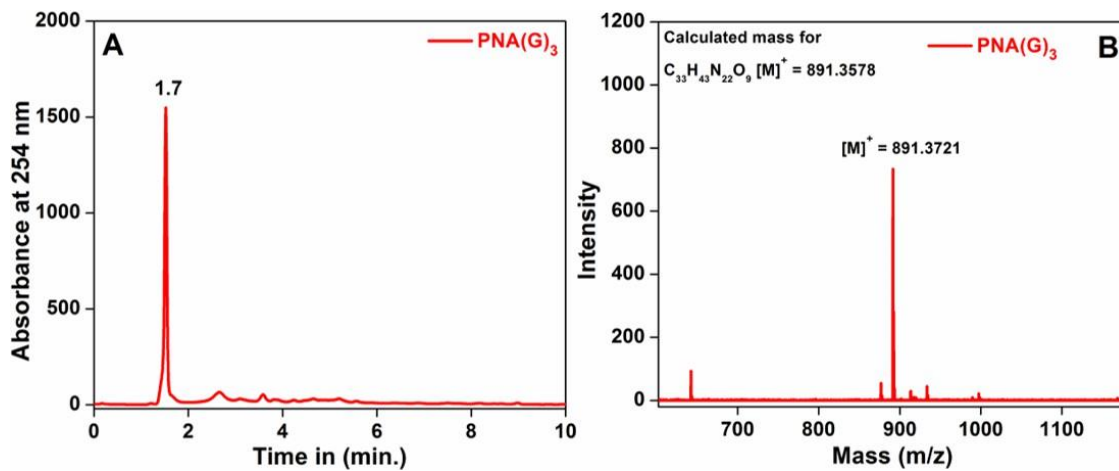

HPLC profiles (A) and MALDI-TOF spectra (B) for PNA-(G)<sub>3</sub>.

### S12. ThT Emission Spectra for PNA-(G)<sub>3</sub>, and PNA-(G)<sub>3</sub>+DNA1

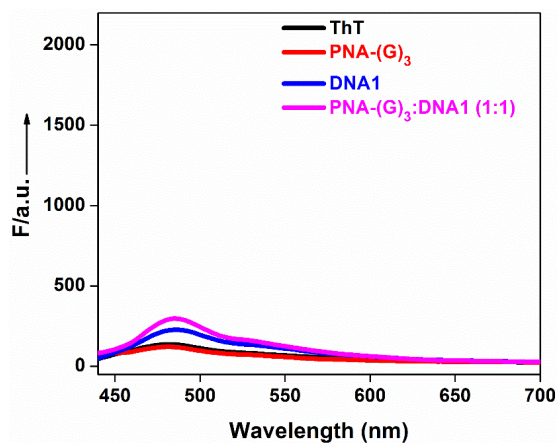

Thioflavin ThT emission spectra for PNA-(G)<sub>3</sub>, PNA-(G)<sub>3</sub>+DNA1 at pH 7.2

### S13. Reversible switching of ThT Emission Spectra for the Collagen-(PNA-GGG)<sub>3</sub> Peptide-3+DNA1 system between pH 7.2 & pH 4.5

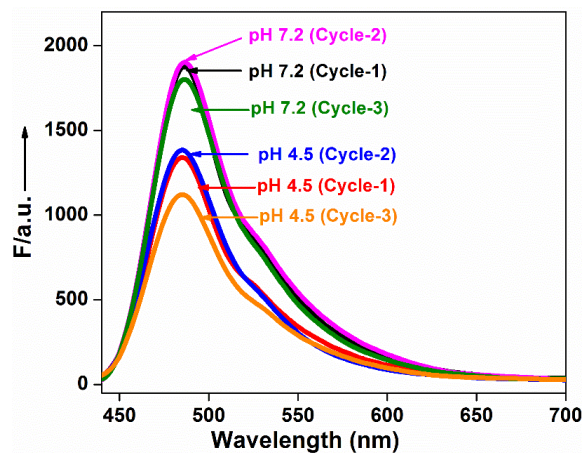

Reversible Thioflavin ThT emission spectra for collagen-(PNA-GGG)<sub>3</sub> (CMP-3)+DNA1 in between pH 7.2 and pH 4.5. ( $\lambda_{ex} = 412$  nm,  $\lambda_{em} = 450-700$  nm). Peptide concentration 20  $\mu$ M. Buffer conditions: 10 mM Tris, 10 mM NaCl at pH 7.2.
